# Supplementary material for: Theoretical study of Au–NX–C catalysts for H2O2 electrosynthesis via two-electron oxygen reduction reaction
Source: Royal Society of Chemistry journal article supplement (doi:10.1039/d4cy00044g), 2024-01-01
Supplement: d4cy00044g1.pdf [file d4cy00044g1.pdf]

## Electronic Supplementary Information

### Theoretical study of Au–N<sub>x</sub>–C catalysts for H<sub>2</sub>O<sub>2</sub> electrosynthesis via two-electron oxygen reduction reaction

Xuefeng Ren <sup>a,\*</sup>, Xiaoman Dong <sup>a</sup>, Zhuofan Wu <sup>a</sup>, Jianghui Cao <sup>a</sup>, Xiaoxuan Yang <sup>c</sup>, Jian Hao <sup>b,\*</sup>,  
Lifen Liu <sup>a</sup>, Gang Wu <sup>c,\*</sup>, Anmin Liu <sup>a,\*</sup>

<sup>a</sup> School of Chemical Engineering, Ocean and Life Sciences, Dalian University of Technology,  
Panjin 124221, China.

E-mail: [renxuefeng@dlut.edu.cn](mailto:renxuefeng@dlut.edu.cn); [liuanmin@dlut.edu.cn](mailto:liuanmin@dlut.edu.cn)

<sup>b</sup> State Key Laboratory of High-efficiency Utilization of Coal and Green Chemical Engineering,  
Ningxia University, Yinchuan 750021, China.

E-mail: [haojian2017@126.com](mailto:haojian2017@126.com)

<sup>c</sup> Department of Chemical and Biological Engineering, University at Buffalo, The State University  
of New York, Buffalo, NY 14260, United States.

E-mail: [gangwu@buffalo.edu](mailto:gangwu@buffalo.edu)

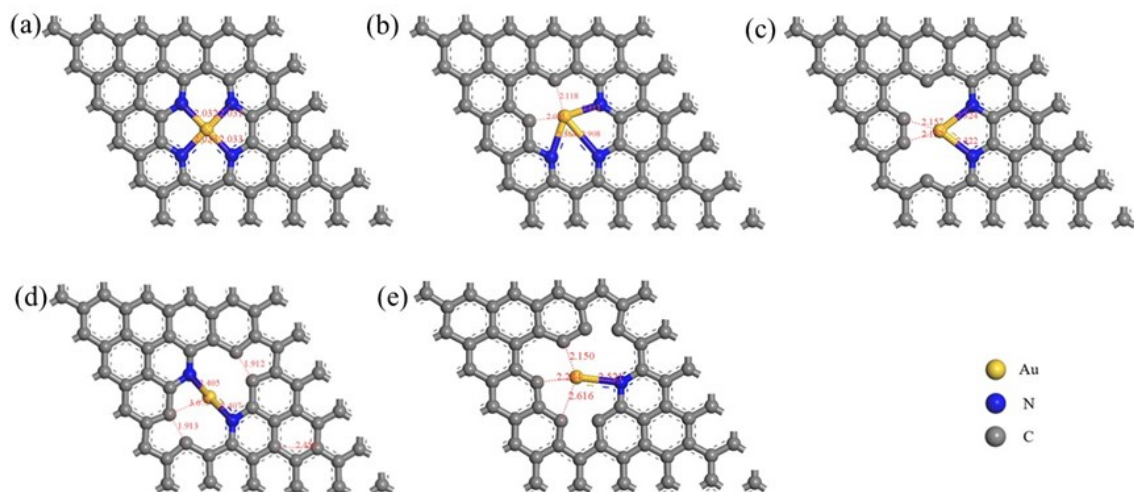

**Figure S1** top view of Au-N<sub>X</sub>-C (X = 1, 2, 3, 4) embedded graphene depicting the bond distance:  
 (a) Au-N<sub>4</sub>-C, (b) Au-N<sub>3</sub>-C, (c) Au-N<sub>2</sub>-C<sub>ortho</sub>, (d) Au-N<sub>2</sub>-C<sub>para</sub>, (e) Au-N<sub>1</sub>-C.

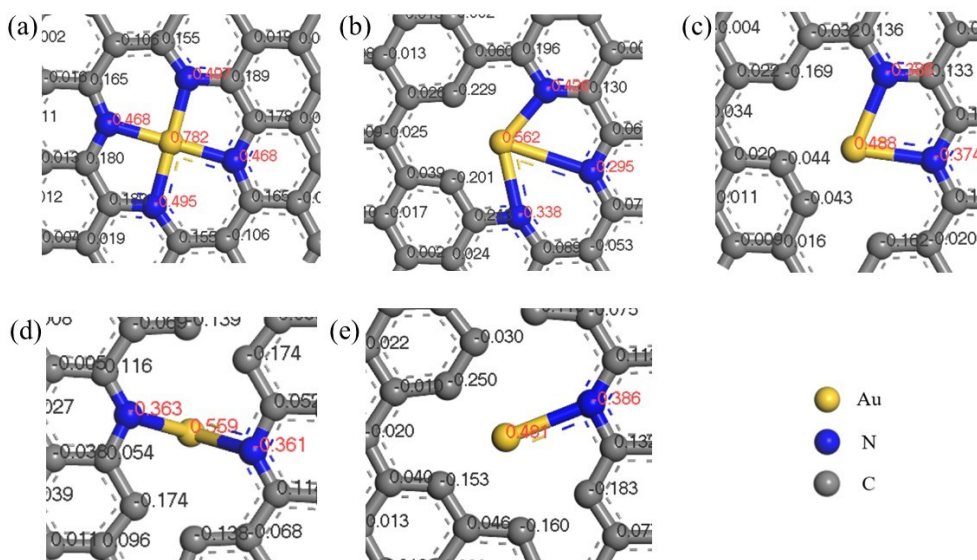

**Figure S2** Charge population of Au-N<sub>X</sub>-C: (a) Au-N<sub>4</sub>-C, (b) Au-N<sub>3</sub>-C, (c) Au-N<sub>2</sub>-C<sub>ortho</sub>, (d) Au-N<sub>2</sub>-C<sub>para</sub>, and (e) Au-N<sub>1</sub>-C.

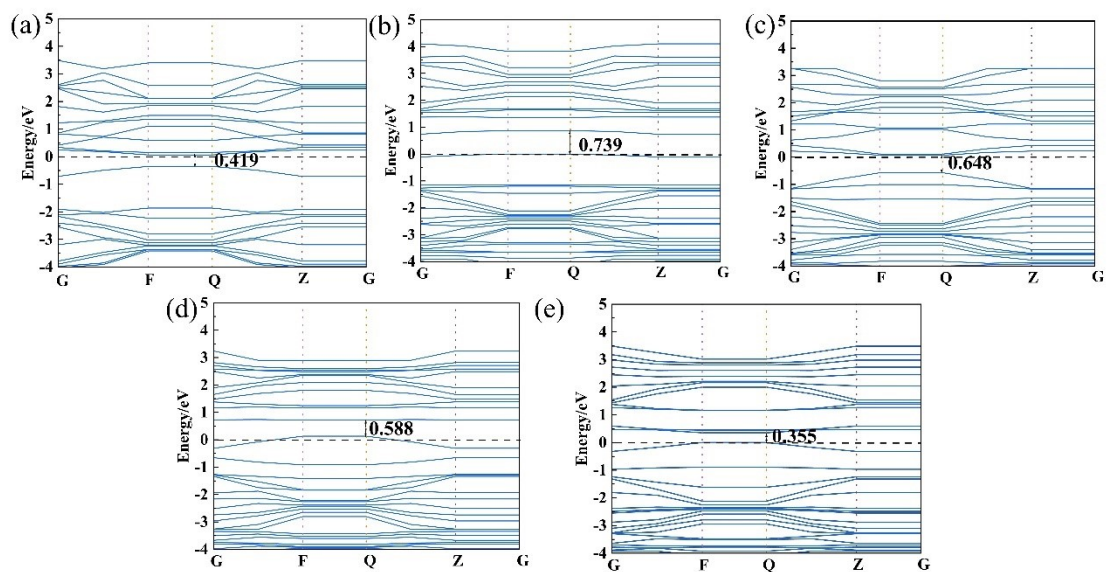

**Figure S3** Energy band diagram of Au-N<sub>x</sub>-C, (a) Au-N<sub>4</sub>-C, (b) Au-N<sub>3</sub>-C, (c) Au-N<sub>2</sub>-C<sub>ortho</sub>, (d) Au-N<sub>2</sub>-C<sub>para</sub>, and (e) Au-N<sub>1</sub>-C.

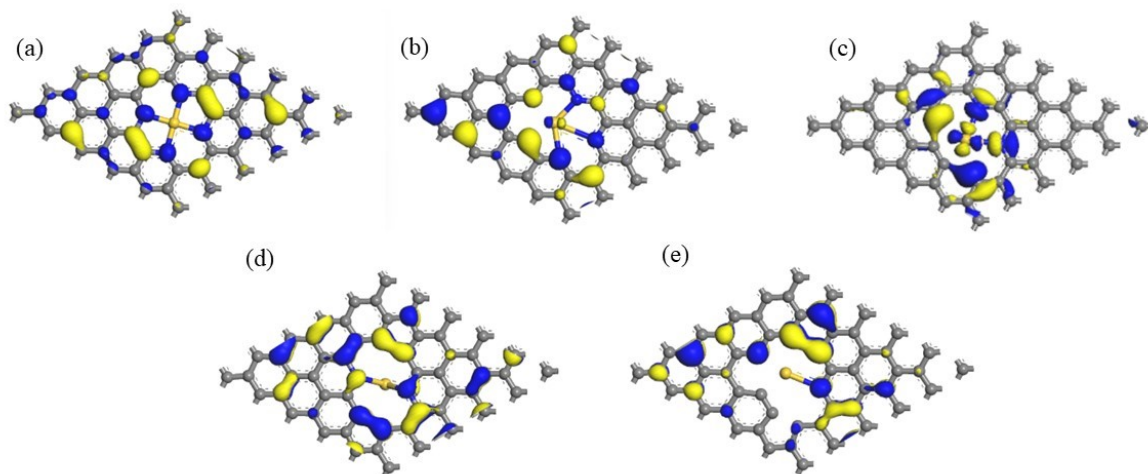

**Figure S4** Highest occupied molecular orbitals in (a) Au-N<sub>4</sub>-C, (b) Au-N<sub>3</sub>-C, (c) Au-N<sub>2</sub>-C<sub>ortho</sub>, (d) Au-N<sub>2</sub>-C<sub>para</sub>, and (e) Au-N<sub>1</sub>-C.

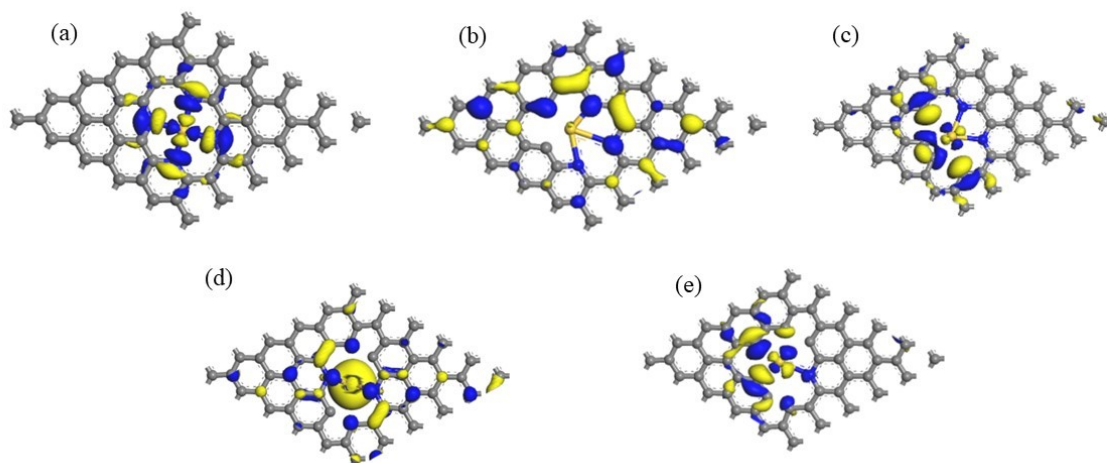

**Figure S5** Lowest unoccupied molecular orbitals in (a) Au-N<sub>4</sub>-C, (b) Au-N<sub>3</sub>-C, (c) Au-N<sub>2</sub>-C<sub>ortho</sub>, (d) Au-N<sub>2</sub>-C<sub>para</sub>, and (e) Au-N<sub>1</sub>-C.

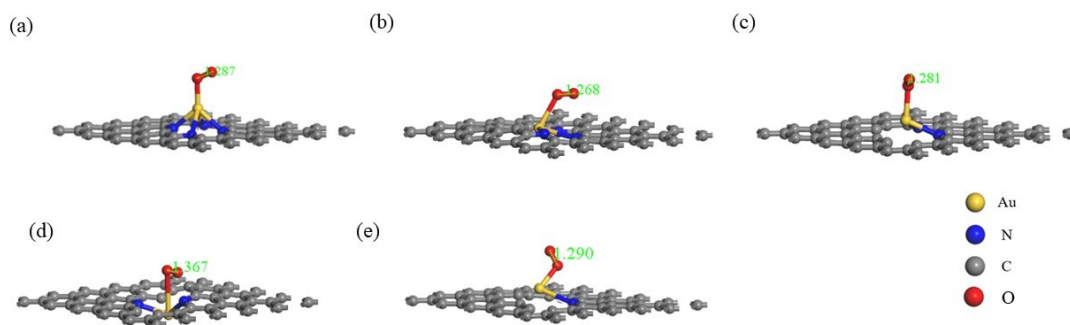

**Figure S6** Side view of the optimized configuration of O<sub>2</sub> adsorption on Au-N<sub>X</sub>-C: (a) Au-N<sub>4</sub>-C, (b) Au-N<sub>3</sub>-C, (c) Au-N<sub>2</sub>-C<sub>ortho</sub>, (d) Au-N<sub>2</sub>-C<sub>para</sub>; and (e) Au-N<sub>1</sub>-C.

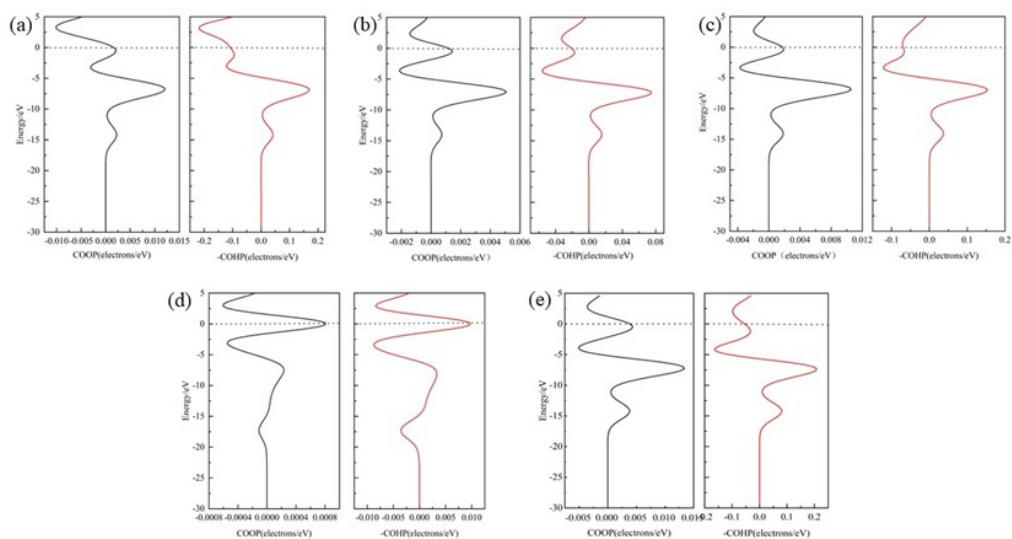

**Figure S7** Crystal orbital overlap population (COOP) and crystal orbital Hamilton population (COHP) of Au-N<sub>x</sub>-C: (a) Au-N<sub>4</sub>-C, (b) Au-N<sub>3</sub>-C, (c) Au-N<sub>2</sub>-C<sub>ortho</sub>, (d) Au-N<sub>2</sub>-C<sub>para</sub>, and (e) Au-N<sub>1</sub>-C.

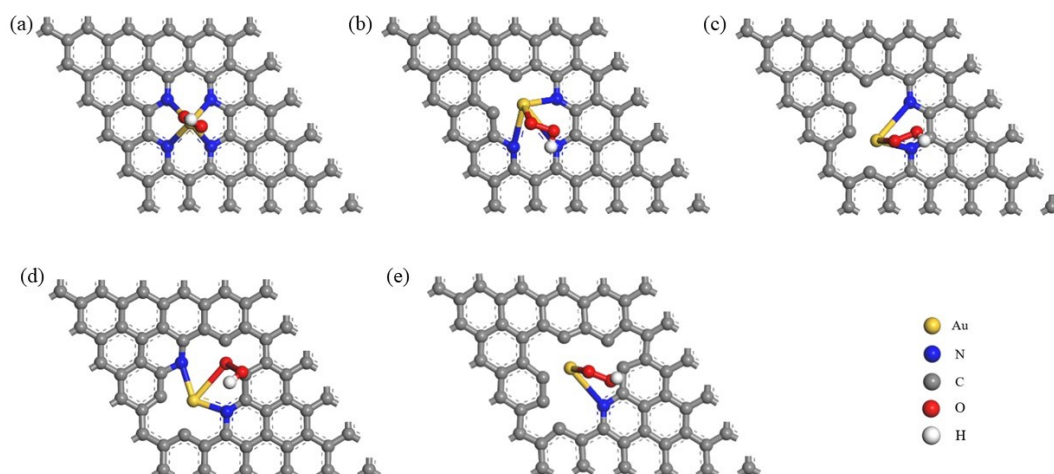

**Figure S8** The structure-optimized model of OOH adsorbed on Au-N<sub>x</sub>-C: (a) Au-N<sub>4</sub>-C, (b) Au-N<sub>3</sub>-C, (c) Au-N<sub>2</sub>-C<sub>ortho</sub>, (d) Au-N<sub>2</sub>-C<sub>para</sub>, and (e) Au-N<sub>1</sub>-C.



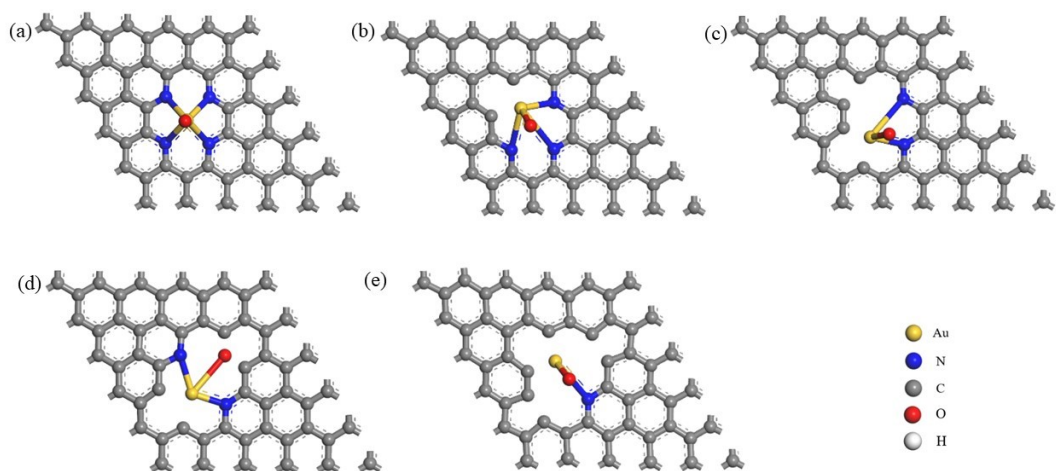

**Figure S9** The structure-optimized model of O adsorbed on Au-N<sub>x</sub>-C: (a) Au-N<sub>4</sub>-C, (b) Au-N<sub>3</sub>-C, (c) Au-N<sub>2</sub>-C<sub>ortho</sub>, (d) Au-N<sub>2</sub>-C<sub>para</sub>, and (e) Au-N<sub>1</sub>-C.

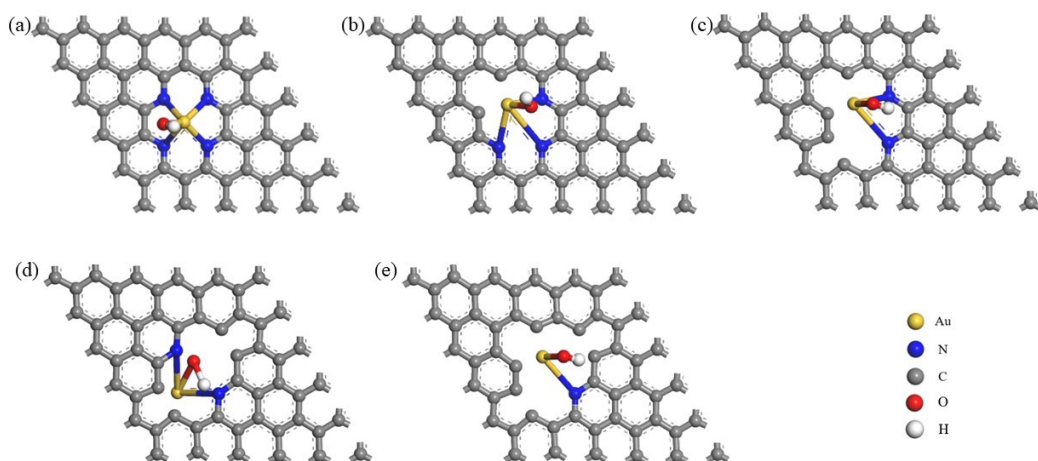

**Figure S10** The structure-optimized model of \*OH adsorbed on Au-N<sub>x</sub>-C: (a) Au-N<sub>4</sub>-C, (b) Au-N<sub>3</sub>-C, (c) Au-N<sub>2</sub>-C<sub>ortho</sub>, (d) Au-N<sub>2</sub>-C<sub>para</sub>, and (e) Au-N<sub>1</sub>-C.

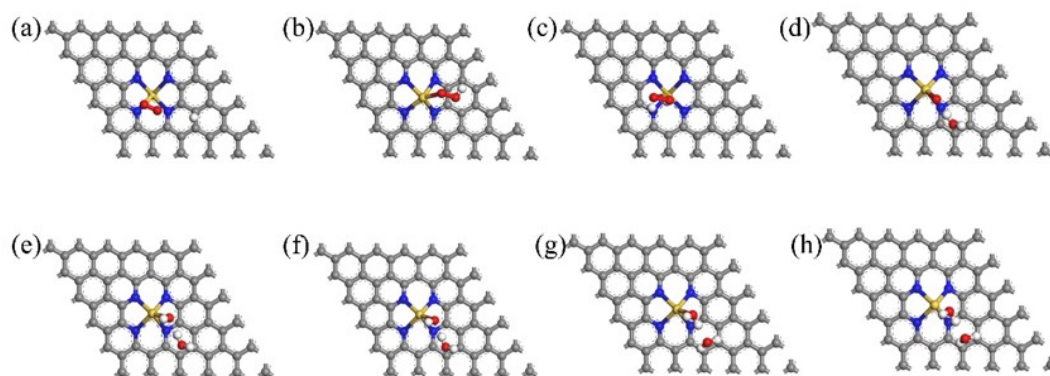

**Figure S11** 4e<sup>-</sup> ORR pathway of the OOH dissociation on Au-N<sub>4</sub>-C: (a) O<sub>2</sub>\* + H<sup>+</sup> + e<sup>-</sup>, (b) OOH\*, (c) OOH\* + H<sup>+</sup> + e<sup>-</sup>, (d) H<sub>2</sub>O + O\*, (e) O\* + H<sup>+</sup> + e<sup>-</sup> + H<sub>2</sub>O, (f) OH\* + H<sub>2</sub>O, (g) OH\* + H<sup>+</sup> + e<sup>-</sup> + H<sub>2</sub>O, (h) 2H<sub>2</sub>O.

**Table S1** The calculation process for free energy on Au-N<sub>4</sub>-C at different electrode potentials

| U=0V                          |                                          |                   |                 |
|-------------------------------|------------------------------------------|-------------------|-----------------|
|                               | $\Delta E + T\Delta S + \Delta ZPE$ (eV) | $\Delta G_U$ (eV) | $\Delta G$ (eV) |
| O <sub>2</sub> *              | 4.92                                     | 0                 | 4.92            |
| OOH*                          | 2.130                                    | 0                 | 2.130           |
| O*                            | 2.128                                    | 0                 | 2.128           |
| OH*                           | 2.127                                    | 0                 | 2.127           |
| H <sub>2</sub> O*             | 0                                        | 0                 | 0               |
| U=1.23V                       |                                          |                   |                 |
| O <sub>2</sub> *              | 4.92                                     | 1.23*4            | 0               |
| OOH*                          | 2.130                                    | 1.23*3            | -1.560          |
| O*                            | 2.128                                    | 1.23*2            | -0.331          |
| OH*                           | 2.127                                    | 1.23*1            | 0.897           |
| H <sub>2</sub> O*             | 0                                        | 1.23*0            | 0               |
| U=0.68V                       |                                          |                   |                 |
| O <sub>2</sub> *              | 4.92                                     | 0.68*2            | 3.560           |
| OOH*                          | 2.130                                    | 0.68*1            | 1.450           |
| H <sub>2</sub> O <sub>2</sub> | 3.560                                    | 0.68*0            | 3.560           |

**Table S2** The calculation process for free energy on Au-N<sub>3</sub>-C at different electrode potentials

| U=0V                          |                                          |                   |                 |
|-------------------------------|------------------------------------------|-------------------|-----------------|
|                               | $\Delta E + T\Delta S + \Delta ZPE$ (eV) | $\Delta G_U$ (eV) | $\Delta G$ (eV) |
| O <sub>2</sub> *              | 4.92                                     | 0                 | 4.92            |
| OOH*                          | 4.742                                    | 0                 | 4.742           |
| O*                            | 4.428                                    | 0                 | 4.428           |
| OH*                           | 4.265                                    | 0                 | 4.265           |
| H <sub>2</sub> O*             | 0                                        | 0                 | 0               |
| U=1.23V                       |                                          |                   |                 |
| O <sub>2</sub> *              | 4.92                                     | 1.23*4            | 0               |
| OOH*                          | 4.742                                    | 1.23*3            | -0.178          |
| O*                            | 4.428                                    | 1.23*2            | 1.968           |
| OH*                           | 4.265                                    | 1.23*1            | 3.035           |
| H <sub>2</sub> O*             | 0                                        | 1.23*0            | 0               |
| U=0.68V                       |                                          |                   |                 |
| O <sub>2</sub> *              | 4.92                                     | 0.68*2            | 3.560           |
| OOH*                          | 4.742                                    | 0.68*1            | 4.062           |
| H <sub>2</sub> O <sub>2</sub> | 3.560                                    | 0.68*0            | 3.560           |



**Table S3** The calculation process for free energy on Au-N<sub>2</sub>-C<sub>ortho</sub> at different electrode potentials

| U=0V                          |                                          |                   |                 |
|-------------------------------|------------------------------------------|-------------------|-----------------|
|                               | $\Delta E + T\Delta S + \Delta ZPE$ (eV) | $\Delta G_U$ (eV) | $\Delta G$ (eV) |
| O <sub>2</sub> *              | 4.92                                     | 0                 | 4.92            |
| OOH*                          | 4.098                                    | 0                 | 4.098           |
| O*                            | 3.641                                    | 0                 | 3.641           |
| OH*                           | 3.645                                    | 0                 | 3.645           |
| H <sub>2</sub> O*             | 0                                        | 0                 | 0               |
| U=1.23V                       |                                          |                   |                 |
| O <sub>2</sub> *              | 4.92                                     | 1.23*4            | 0               |
| OOH*                          | 4.098                                    | 1.23*3            | -0.822          |
| O*                            | 3.641                                    | 1.23*2            | 1.181           |
| OH*                           | 3.645                                    | 1.23*1            | 2.415           |
| H <sub>2</sub> O*             | 0                                        | 1.23*0            | 0               |
| U=0.68V                       |                                          |                   |                 |
| O <sub>2</sub> *              | 4.92                                     | 0.68*2            | 3.560           |
| OOH*                          | 4.098                                    | 0.68*1            | 3.398           |
| H <sub>2</sub> O <sub>2</sub> | 3.560                                    | 0.68*0            | 3.560           |

**Table S4** The calculation process for free energy on Au-N<sub>2</sub>-C<sub>para</sub> at different electrode potentials

| U=0V                          |                                          |                   |                 |
|-------------------------------|------------------------------------------|-------------------|-----------------|
|                               | $\Delta E + T\Delta S + \Delta ZPE$ (eV) | $\Delta G_U$ (eV) | $\Delta G$ (eV) |
| O <sub>2</sub> *              | 4.92                                     | 0                 | 4.92            |
| OOH*                          | 5.489                                    | 0                 | 5.489           |
| O*                            | 5.459                                    | 0                 | 5.459           |
| OH*                           | 5.454                                    | 0                 | 5.454           |
| H <sub>2</sub> O*             | 0                                        | 0                 | 0               |
| U=1.23V                       |                                          |                   |                 |
| O <sub>2</sub> *              | 4.92                                     | 1.23*4            | 0               |
| OOH*                          | 4.098                                    | 1.23*3            | 0.569           |
| O*                            | 3.641                                    | 1.23*2            | 2.999           |
| OH*                           | 3.645                                    | 1.23*1            | 4.224           |
| H <sub>2</sub> O*             | 0                                        | 1.23*0            | 0               |
| U=0.68V                       |                                          |                   |                 |
| O <sub>2</sub> *              | 4.92                                     | 0.68*2            | 3.560           |
| OOH*                          | 5.489                                    | 0.68*1            | 4.789           |
| H <sub>2</sub> O <sub>2</sub> | 3.560                                    | 0.68*0            | 3.560           |

**Table S5** The calculation process for free energy on Au-N<sub>1</sub>-C at different electrode potentials

| U=0V                          |                                          |                   |                 |
|-------------------------------|------------------------------------------|-------------------|-----------------|
|                               | $\Delta E + T\Delta S + \Delta ZPE$ (eV) | $\Delta G_U$ (eV) | $\Delta G$ (eV) |
| O <sub>2</sub> *              | 4.92                                     | 0                 | 4.92            |
| OOH*                          | 4.455                                    | 0                 | 4.455           |
| O*                            | 2.668                                    | 0                 | 2.668           |
| OH*                           | 2.620                                    | 0                 | 2.620           |
| H <sub>2</sub> O*             | 0                                        | 0                 | 0               |
| U=1.23V                       |                                          |                   |                 |
| O <sub>2</sub> *              | 4.92                                     | 1.23*4            | 0               |
| OOH*                          | 4.455                                    | 1.23*3            | -0.465          |
| O*                            | 2.668                                    | 1.23*2            | 0.208           |
| OH*                           | 2.620                                    | 1.23*1            | 1.390           |
| H <sub>2</sub> O*             | 0                                        | 1.23*0            | 0               |
| U=0.68V                       |                                          |                   |                 |
| O <sub>2</sub> *              | 4.92                                     | 0.68*2            | 3.560           |
| OOH*                          | 4.455                                    | 0.68*1            | 3.775           |
| H <sub>2</sub> O <sub>2</sub> | 3.560                                    | 0.68*0            | 3.560           |
